1  
2  
3  
4  
5  
6  
7  
8  
9  
10  
11  
12  
13  
14  
15  
16  
17  
18  
19  
20  
21  
22  
23  
24  
25  
26  
27  
28  
29  
30  
31  
32  
33  
34  
35  
36  
37  
38  
39  
40  
41  
42  
43  
44  
45  
46  
47  
48  
49

## **A different state of mind: neural activity related to volitionally up- versus downregulating cortical excitability**

Kathy Ruddy<sup>1,2</sup>, Joshua Balsters<sup>1,3</sup>, Dante Mantini<sup>1,4</sup>, Quanying Liu<sup>1,4</sup>, Pegah Kassraian-Fard<sup>1</sup>, Nadja Enz<sup>1</sup>, Ernest Mihelj<sup>1</sup>, Bankim Chander<sup>5</sup>, Surjo R. Soekadar<sup>5,6</sup>, Nicole Wenderoth<sup>1\*</sup>.

1. Neural Control of Movement Lab, ETH, Zürich, Switzerland.
2. Institute of Neuroscience, Trinity College Dublin, Ireland
3. Department of Psychology, Royal Holloway, University of London, UK
4. Movement Control and Neuroplasticity Research Group, KU Leuven, Leuven, Belgium
5. Applied Neurotechnology Laboratory, University of Tübingen, Tübingen, Germany
6. Clinical Neurotechnology Laboratory, Clinical Neurotechnology Laboratory, Neuroscience Research Center (NWFZ) & Department of Psychiatry and Psychotherapy, Charité – University Medicine Berlin, Berlin, Germany

\*Corresponding Author

Neural Control of Movement Lab,  
Department of Health Sciences and Technology,  
ETH Zürich  
Winterthurerstrasse 190  
8057 Zürich  
Switzerland

50  
51  
52  
53  
54  
55  
56  
57  
58  
59  
60  
61  
62  
63  
64  
65  
66  
67  
68  
69  
70  
71  
72  
73  
74  
75  
76  
77  
78  
79  
80  
81  
82  
83  
84  
85

**Abstract**

To date there exists no reliable method to non-invasively upregulate or downregulate the state of the resting motor system over a large dynamic range. Here we show that an operant conditioning paradigm which provides neurofeedback of the size of motor evoked potentials (MEPs) in response to transcranial magnetic stimulation (TMS), enables participants to self-modulate their own brain state. Following training, participants were able to robustly increase (by 83.8%) and decrease (by 30.6%) their MEP amplitudes. This volitional up-versus down-regulation of corticomotor excitability caused an increase of late-cortical disinhibition (LCD), a TMS derived read-out of presynaptic GABA<sub>B</sub> disinhibition, which was accompanied by an increase of gamma and a decrease of alpha oscillations in the trained hemisphere. This approach paves the way for future investigations into how altered brain state influences motor neurophysiology and recovery of function in a neurorehabilitation context.

86 Rhythmic oscillatory brain activity at rest is associated with high versus low  
87 neuronal responsiveness, or ‘excitability’ of region <sup>1,2</sup>. Measuring these momentary  
88 fluctuations of neural activity via electro- or magnetoencephalography (EEG/MEG)  
89 over human primary motor cortex (M1), it has been demonstrated that frequency,  
90 amplitude and phase of the ongoing oscillation cycle systematically modulate responses  
91 evoked by transcranial magnetic stimulation (TMS) <sup>3-8</sup>. In particular, it has been shown  
92 that corticomotor excitability is significantly higher when the power (amplitude) of  
93 sensorimotor rhythms in the alpha band (8-14 Hz, also called the ‘mu’-rhythm), or beta  
94 band (15-30 Hz) are low, or when M1 is stimulated during the trough of the oscillatory  
95 cycle of these rhythms <sup>9</sup>. This concept has inspired neurofeedback interventions  
96 whereby, for example, stroke patients learn to volitionally desynchronize sensorimotor  
97 rhythms with the goal of bringing the sensorimotor system into a more excitable state  
98 as a precursor for enhanced neural plasticity and accelerated recovery <sup>10-12</sup>.

99

100 Previous research has focussed on interactions between corticomotor  
101 excitability and cortical dynamics at rest, but much less is known about whether it is  
102 possible to *voluntarily* control the excitability of sensorimotor circuits while keeping  
103 motor output and sensory feedback constant. In the case of stroke rehabilitation, this  
104 mechanism may become particularly relevant as patients are unable to move or receive  
105 sensory feedback from the paretic limb. Therefore, interventions that optimally harness  
106 the residual ability to voluntarily and endogenously activate relevant brain circuits in  
107 the days and weeks after the incident, may provide the crucial innervation necessary to  
108 promote re-wiring for functional recovery <sup>13</sup>.

109

110 It is well known that primates <sup>14,15</sup>, and humans <sup>10, 16-19</sup> can gain volitional  
111 control of neural activity by receiving neurofeedback via a brain-computer interface  
112 (BCI). Here, we used a BCI-neurofeedback approach as an effective method for  
113 training participants to both volitionally upregulate and downregulate corticomotor  
114 excitability as reflected by the size of TMS-evoked motor potentials (MEPs), with the  
115 aim to modulate their amplitudes over a much larger dynamic range than observed  
116 during rest. Using this approach enabled us to investigate the neural mechanisms that  
117 underlie volitional up- versus down-regulation of corticospinal excitability in the  
118 motor system and the associated oscillatory signatures. By modulating one neural  
119 marker, i.e. motor evoked potential amplitude, while measuring independent

120 modalities using EEG, or paired-pulse TMS, this approach allows us to causally relate  
121 voluntary rather than incidental changes of corticomotor excitability to cortical  
122 dynamics.

123

124 To achieve this goal we developed a BCI by stimulating the cortex with TMS and  
125 providing neurofeedback of MEP amplitudes (Fig. 1). The feedback was designed such  
126 that participants were rewarded for larger than average MEPs in one condition, and  
127 smaller than average in another condition.

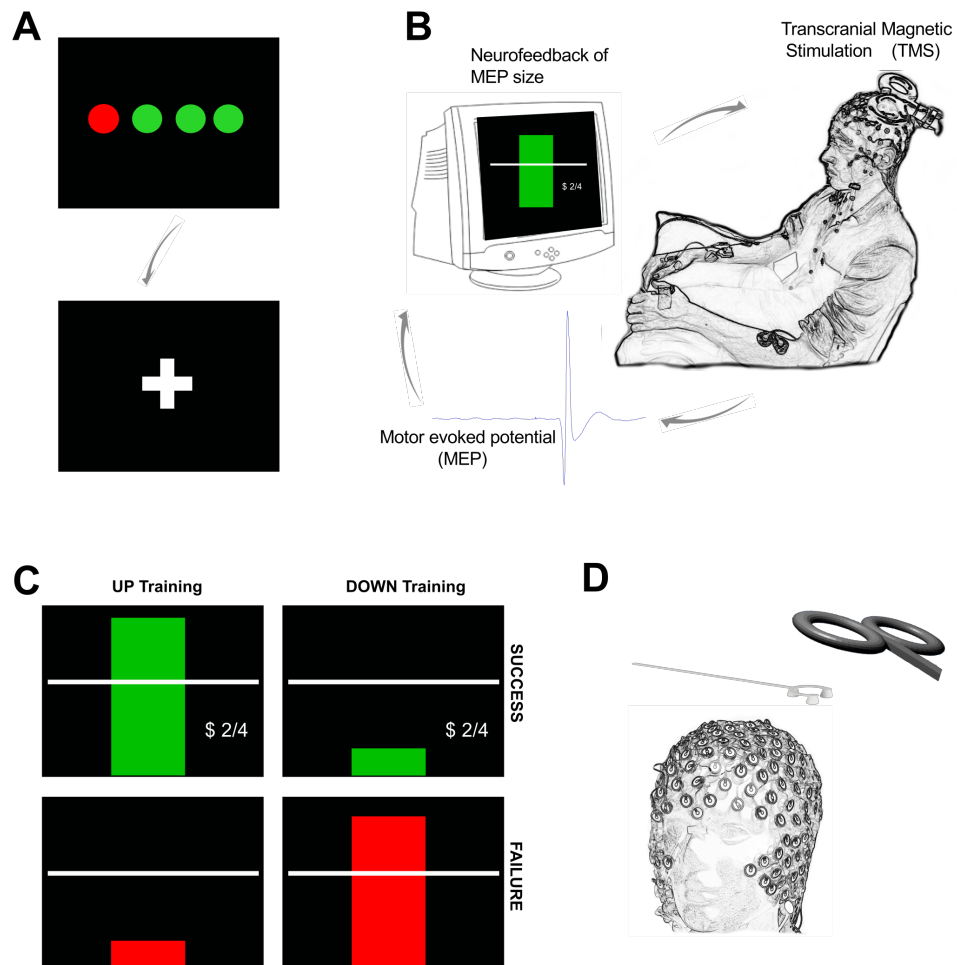

128

129 **Figure 1. Outline of experimental setup.** Each trial of neurofeedback training commenced with a  
130 display of four circles (A), each representing the background EMG in one of the recorded hand muscles  
131 (right FDI, ADM and OP, and left FDI). The circles were red if the root mean squared (rms) EMG at rest  
132 was greater than 7 microvolts. It was essential that all four circles were green for at least 500ms before  
133 the trial could proceed. When this condition was met a fixation cross appeared for a random period (in  
134 order to prevent anticipation of the TMS pulse). During the fixation cross, it was still essential to keep  
135 the background EMG below 7 microvolts in order for a TMS pulse to be delivered. (B) The peak-peak

136 amplitude of the motor evoked potential (MEP) evoked by the TMS was calculated in real-time and  
137 displayed immediately to the participant on screen in the form of a rectangular bar.

138 (C) Different feedback for UP training and DOWN training. In the UP training If the MEP was greater  
139 than the baseline mean, the rectangle was green, with a green tick, a dollar sign to indicate a small  
140 financial reward, a display of the current score, and a positive encouraging sound bite was heard. If the  
141 MEP did not meet the criterion amplitude, the bar was red, there was no dollar sign, and a negative sound  
142 bite was heard. (D) A custom 3D printed ‘coil spacer’ device was used to prevent direct contact of the  
143 TMS coil on the EEG electrodes and allow the pre-TMS EEG period to be recorded artefact free.

144

145

146 In a within-subject cross-over design, participants performed four training  
147 sessions with TMS-neurofeedback of MEP amplitudes in order to learn how to up- and  
148 downregulate their corticomotor excitability (two ‘UP’ sessions, two ‘DOWN’  
149 sessions, order counterbalanced across participants). After the training we characterised  
150 the neural underpinnings of these two distinct activity states in detail by conducting a  
151 series of multimodal experiments using EEG and paired pulse TMS to profile the  
152 associated oscillatory and neurophysiological processes. As it has been proposed that  
153 dynamic modulation of neuronal activity is realized via synchronization of high  
154 frequency rhythms <sup>20</sup> which are tightly coupled to desynchronizing sensorimotor  
155 rhythms <sup>21</sup>, we hypothesised that Gamma synchronisation (31-80Hz) and alpha (8-  
156 13Hz) /beta (14-30Hz) desynchronization play a critical role in actively determining  
157 the state of the motor cortex. Specifically, we hypothesised that following UP  
158 neurofeedback training, MEP amplitudes would be increased, and this volitional  
159 upregulation would be associated with increased gamma synchronisation and  
160 alpha/beta desynchronization. Concurrent reductions in TMS-derived measures of  
161 inhibition were also hypothesised during upregulation. The reverse pattern was  
162 predicted following DOWN neurofeedback training.

163

164

## 165 **RESULTS**

166

167 *Bidirectional changes in corticospinal excitability were observed in the MEP*  
168 *neurofeedback group but not in a control group.*

169

170 We first tested whether participants could learn to volitionally increase or decrease  
171 (bidirectional) corticomotor excitability when using a motor imagery strategy shaped  
172 by neurofeedback of MEP amplitudes. Across two training sessions, we found that

173 MEP amplitudes increased during UP training (Fig. 2A, orange symbols) and decreased  
174 during DOWN training (Fig. 2A, blue symbols) relative to the baseline measurement  
175 (BS), revealing a significant dissociation over time (*neurofeedback type* x *block*  
176 *number* interaction during training session 1 [ $F(4,115.9)=3.87$ ,  $p=0.006$ ], session 2  
177 [ $F(4,125.0)=3.7$ ,  $p=0.007$ ] and EEG session [ $F(2,70)=6.9$ ,  $p=0.002$ ], *F tests following*  
178 *mixed effects models*,  $n=15$ ; see supplementary Fig. 1 for additional analyses). Since  
179 MEP amplitudes are a compound measure of excitability influenced by multiple neural  
180 elements<sup>22</sup>, including background muscle activity<sup>23,24</sup>, we repeated this analysis using  
181 the root mean squared (rms) background muscle activation (EMG) recorded in the  
182 100ms prior to each TMS pulse. Importantly, this control analysis revealed no such  
183 interactions on any of the sessions, suggesting that the observed modulation was not  
184 driven by changes in peripheral activity of the target muscle, nor any of the additional  
185 3 control muscles (OP, ADM, left FDI) (all  $p>0.18$ , see Supplementary Table 2).  
186

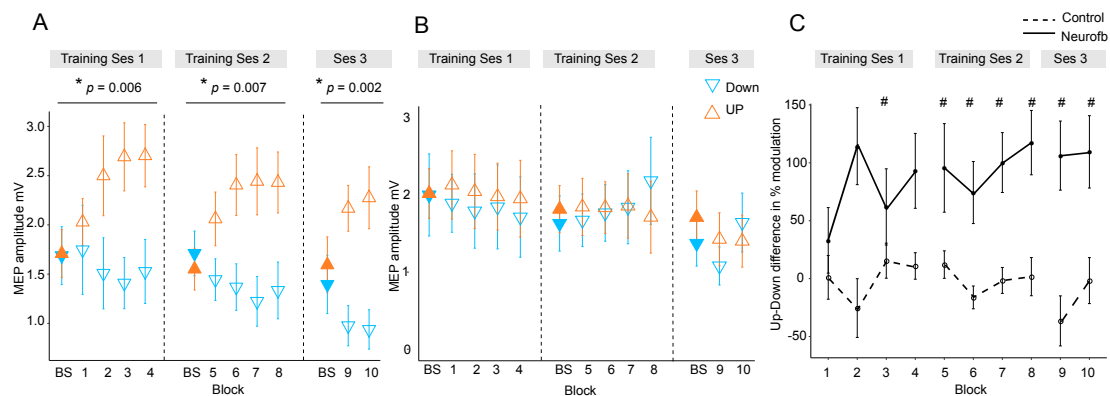

187  
188 **Figure 2. MEP amplitudes during neurofeedback.** Panel A depicts MEP amplitude in millivolts during  
189 the two types of MEP neurofeedback. UP training is shown in orange and DOWN training in blue, across  
190 all 10 training blocks. Filled triangles labelled ‘BS’ indicate the baseline measurement block that  
191 occurred at the beginning of that particular session, prior to any neurofeedback. Dotted vertical lines  
192 indicate the separation of the blocks into different ‘sessions’, which occurred on separate days. Panel B  
193 shows the same data for the control group who received no veridical neurofeedback. Panel C shows the  
194 UP-DOWN difference (in the normalised % change from baseline data) for each block in the  
195 experimental group and the control group. Higher values represent greater deviations between the UP  
196 and DOWN data points and therefore more modulation of MEP amplitude. Thus, these values are  
197 significantly higher in the experimental group than in the control group. # symbols indicate blocks in  
198 which the Cohen’s *d* effect size for the difference between the experimental and control group was large-  
199 very large (>0.8). All data are shown as mean  $\pm$ SEM.

200  
201

202 In order to isolate the effect of the neurofeedback, we included a control group who  
203 undertook the same protocol, using the same mental imagery strategies, but with  
204 feedback that was not contingent on the MEP amplitudes. This group exhibited no  
205 systematic changes of corticomotor excitability across training (Fig. 2B) and mixed  
206 effects models revealed no significant *neurofeedback type* x *block number* interactions  
207 on any of the separate testing sessions in the control group (all  $p > 0.06$ , note that  
208 statistics approached significance for the second session because MEPs were randomly  
209 higher in the DOWN than in the UP condition; see Supplementary Fig. 1B for further  
210 details). Additionally, there were no significant differences in background EMG (All  
211  $p > 0.09$ , Supplementary Table 2). Next we compared the performance of the  
212 experimental and the control group, by normalizing MEP amplitudes to baseline (%  
213 change) and calculating the difference between UP and DOWN (Fig. 2C). The  
214 differences were substantial in the experimental group, who exhibited on average MEP  
215 amplitudes twice as large during UP than during DOWN, and differed significantly  
216 from the control group where systematic differences were virtually absent (effect of  
217 ‘Group’ [ $F(1,25.6)=13.32, p=0.001$ ], *F tests following mixed effects, n=28*). The effect  
218 sizes (Cohen’s *d*) of the between-group differences were small for the first two blocks  
219 ( $< 0.5$ ), but consistently increased during training ( $d= 1.27$  for block 8), and remained  
220 high in the two blocks of the EEG session ( $d > 0.97$ ). As the control group were  
221 executing the same mental imagery strategies as the experimental group, this  
222 comparison demonstrates that veridical TMS neurofeedback was essential for gaining  
223 volitional control over corticomotor excitability.

224

225 *Neurofeedback training effects are retained for at least 6 months*

226

227 In a follow-up investigation approximately 6 months following initial neurofeedback  
228 training, we showed for a subset of the participants ( $n=11$ ) that they had retained the  
229 ability to upregulate and downregulate their MEP amplitude with neurofeedback (Fig.3;  
230 significant effect of neurofeedback type (UP vs DOWN) in a retention block carried  
231 out with no top-up training ( $F(1,10)=6.64, p=0.028$ ). Measurements of resting MEP  
232 amplitude taken 5 and 10 minutes following the retention block indicated no after-  
233 effects (all  $p > 0.2$ ) indicating that subjects could acutely control corticomotor  
234 excitability without long-lasting after-effects. Having verified that the ability to  
235 modulate brain states had been robustly retained, we next tested whether participants  
236 could sustain this performance even when feedback was removed. Performing a

237 feedback-free block, we found that MEP amplitude was significantly larger in the UP  
238 versus DOWN condition ( $F(1,10)=12.32$ ,  $p=0.006$ ), indicating that when participants  
239 have reached a sufficient level of training they have optimised their mental strategies  
240 and no longer require continuous feedback.

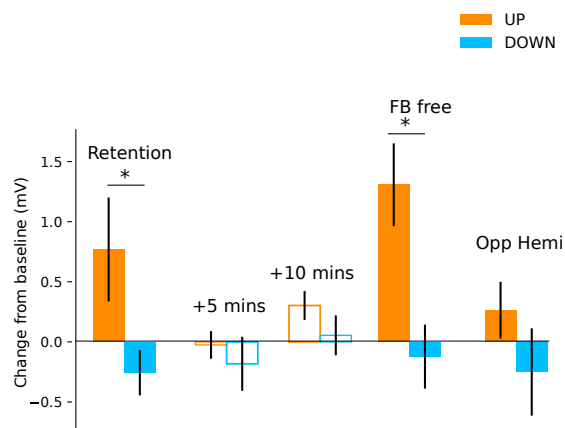

241  
242 **Figure 3. Retention, aftereffects and feedback-free measurements.** Filled bars represent blocks of  
243 neurofeedback, and unfilled bars represent MEPs collected at rest. Panel A shows MEP amplitudes with  
244 their preceding resting baseline values subtracted. Values above 0 represent increases relative to baseline,  
245 and below 0 represent decreases. State-dependent neurofeedback training feedback effects were still  
246 evident in a retention block carried out approximately 6 months following the initial experiment. No  
247 aftereffects were observed on resting MEP amplitude 5 and 10 minutes later. In a separate block  
248 participants were capable of upregulating and downregulating MEP amplitudes with feedback removed  
249 (FB free). MEPs measured from the opposite hemisphere during neurofeedback exhibited a similar  
250 pattern of modulation.

251  
252  
253 In order to measure whether the feedback-induced changes in corticospinal excitability  
254 were specific to the hemisphere targeted by the neurofeedback, we used two TMS coils  
255 simultaneously and performed one block of 40 trials, where half of the TMS pulses were  
256 applied to the left hemisphere (i.e. the usual feedback hemisphere), and the other half  
257 to the right (i.e. the opposite hemisphere). We found that the same pattern of  
258 upregulation and downregulation of MEP amplitudes was observed in the opposite  
259 hemisphere, an effect that approached significance ( $F(1,20)=4.032$ ,  $p=0.07$ ) but was  
260 much smaller than in the neurofeedback hemisphere particularly for the UP condition  
261 (UP  $d = 1.01$  for neurofeedback hemi,  $d=0.27$  for opp. hemi, DOWN  $d= 0.40$  for  
262 neurofeedback hemi,  $d=0.35$  for opp. hemi, Fig. 3).

263



264

265

266

267

268 *Paired pulse TMS investigation of mechanisms*

269

270 Finally, we investigated which excitatory/inhibitory circuits may have contributed to  
271 the changes in corticomotor excitability, using paired pulse TMS measures of three  
272 different neurophysiological processes: (i) Short-interval intracortical inhibition (SICI),  
273 believed to reflect postsynaptic GABA<sub>A</sub> inhibition<sup>25</sup>; (ii) Long interval intra-cortical  
274 inhibition (LICI), considered as a marker for postsynaptic GABA<sub>B</sub> inhibition; and (iii)  
275 late-cortical disinhibition (LCD), which is thought to measure presynaptic GABA<sub>B</sub>  
276 disinhibition, and manifests as a period in which MEP amplitude returns to and  
277 typically overshoots baseline levels, in a time window following LICI (~220ms after a  
278 suprathreshold conditioning TMS pulse)<sup>26-28</sup>. In the following analyses we determined  
279 the time point (baseline vs during NF) x neurofeedback type (UP, DOWN) interaction  
280 and applied FDR correction for multiple testing. Single pulse MEPs collected during  
281 these measurement blocks (25% of all trials) revealed significantly larger MEP  
282 amplitudes for the UP than the DOWN condition, replicating the findings of the main  
283 experiment (Fig. 4A; significant time point x neurofeedback type interaction:  
284  $F(1,27.67)=14.36$ ,  $p_{FDR}=0.001$ ). Surprisingly, there were no significant differences in  
285 the magnitude of SICI (% of single pulse MEPs) between the resting baseline data and  
286 the SICI MEPs collected during neurofeedback, nor between the UP versus DOWN  
287 states (time point x neurofeedback type interaction [ $F(1,28.31)=0.08$ ,  $p_{FDR}=0.77$ ]). The  
288 same was true for LICI (time point x neurofeedback type interaction [ $F(1,28.90)=0.02$ ,  
289  $p_{FDR}=0.88$ ]). Thus, circuits controlling postsynaptic inhibition did not seem to be  
290 differentially modulated by the UP versus DOWN state. However, for LCD there was  
291 a significant time point x neurofeedback type interaction ( $F(1,28.35)=12.09$ ,  
292  $p_{FDR}=0.002$ , Fig.4B).

293 Pairwise comparisons revealed that LCD was significantly elevated in the UP  
294 condition, when compared to the baseline measurement taken immediately before  
295 neurofeedback (Fig. 4B, right panel, MeanDiff=50.9%,  $df=28.35$ ,  $p<0.001$ ) and when  
296 compared to the equivalent data recorded in the DOWN condition (MeanDiff=56.1%,

297  $df=28.76$ ,  $p<0.001$ ). For the DOWN condition LCD did not differ significantly from  
298 baseline ( $p=0.45$ ).  
299

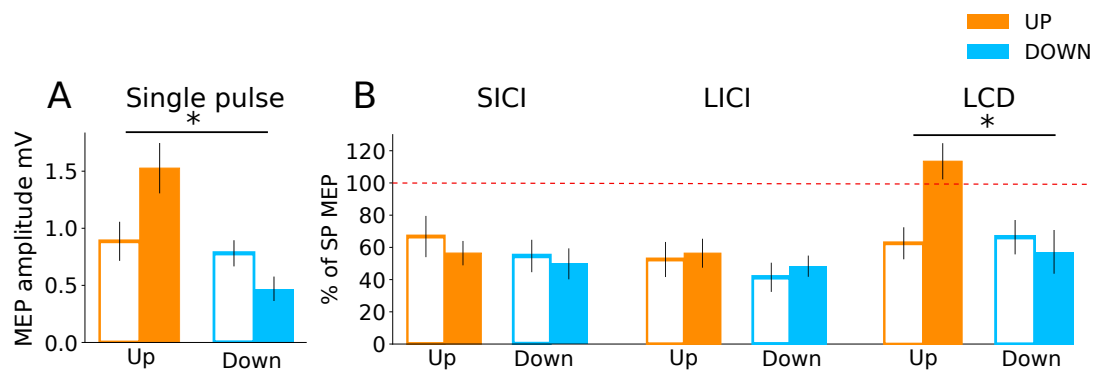

300  
301 **Figure 4. Investigation into mechanisms of MEP neurofeedback.** The data show paired pulse TMS  
302 measurements taken during neurofeedback blocks to probe distinct neurophysiological processes. In all  
303 subsequent panels, unfilled bars represent baseline MEP amplitudes collected at rest prior to the block.  
304 Panel A Shows that MEP amplitudes from the single pulses (from which neurofeedback was provided)  
305 exhibited the same state-dependent modulation as observed previously. In Panel B MEP amplitudes are  
306 expressed as a percentage of the single pulse MEPs. While expected levels of inhibition were observed  
307 for both SICI and LICI paired pulses, there was no state-dependent modulation. LCD was, however,  
308 significantly increased in the UP condition relative to baseline, and relative to the DOWN condition.  
309

310  
311

### 312 *Distinct oscillatory signatures for high versus low corticospinal excitability*

313

314 As part of the initial training study (see Figure 2A, ‘Ses 3’ for the behavioural results),  
315 we investigated whether the two different activity states evoked differential cortical  
316 dynamics extracted from EEG recordings which were acquired simultaneously while  
317 TMS was being performed to provide neurofeedback of MEP amplitude. As distinct  
318 functions have been ascribed to 8 different sub-frequency bands across the known range  
319 of brain signals (0.1 - 80Hz), we now probed whether volitional changes in  
320 corticospinal excitability of M1, drives neural activity measured in the delta (0.1-4Hz),  
321 theta (5-7Hz), low alpha (8-10Hz), high alpha (11-13Hz), low beta (14-21Hz), high  
322 beta (22-30Hz), low gamma (31-50Hz) and high gamma (51-80Hz) bands. Using the  
323 portion of EEG data collected in the 1.5 seconds prior to each TMS pulse, we calculated  
324 relative power in the UP and DOWN states for the eight frequency bands of interest.  
325 Figure 5a-f ( $n=15$ ) shows that UP- versus DOWN regulating corticomotor excitability  
326 caused reduced band-limited power in the theta and alpha band (blue areas in Fig.5b-

327 d) while gamma power was clearly increased. (red areas in Fig.5e,f). For each  
328 participant, we extracted the information for the electrode closest to their individual  
329 motor hotspot (Figure 5a shows the different locations across participants) and  
330 calculated whether the UP-DOWN difference ( $\Delta$  relative power %) deviated  
331 significantly from 0 (Fig. 5g). Wilcoxon signed rank tests revealed significantly higher  
332 power for the UP than DOWN condition in the Delta ( $p_{FDR}=0.024$ ,  $d=0.754$ ), Low  
333 Gamma ( $p_{FDR}=0.024$ ,  $d=0.753$ ) and High Gamma ( $p_{FDR}=0.016$ ,  $d=0.712$ ) band and  
334 significantly lower power for UP than DOWN in the theta ( $p_{FDR}=0.003$ ,  $d=0.947$ ), low  
335 alpha ( $p_{FDR}=0.004$ ,  $d=0.805$ ) and high alpha band ( $p_{FDR}=0.007$ ,  $d=0.714$ ). Although the  
336 feedback was lateralised to MEPs from the right limb (left hemisphere motor hotspot),  
337 we also quantified the same neural oscillations at the corresponding location in the  
338 opposite hemisphere. Here, only the theta rhythm showed significantly lower power for  
339 the UP than the DOWN state ( $p_{FDR}<0.001$ ,  $d=1.071$ , see Supplementary Fig. 2).  
340

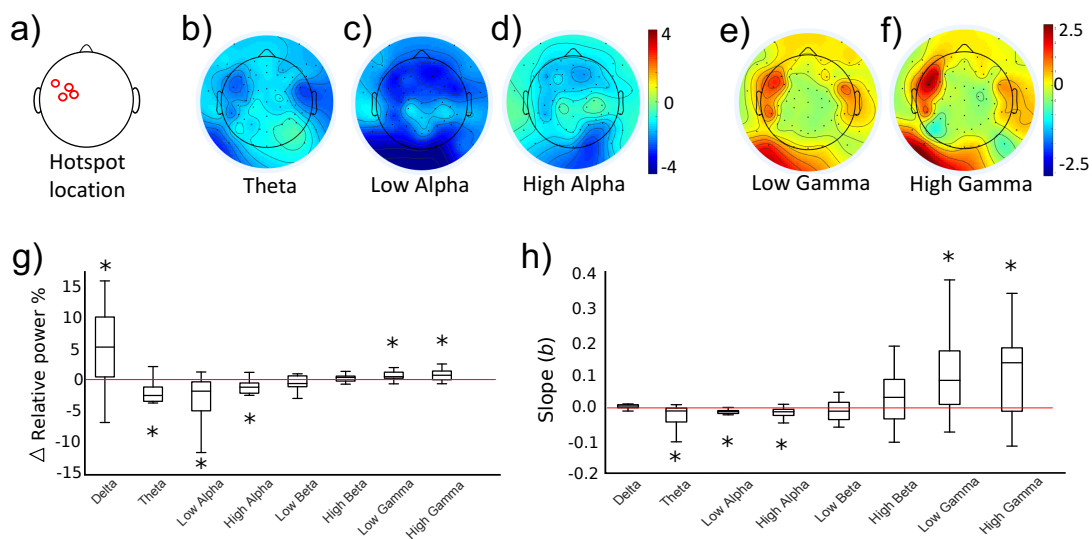

341  
342 **Figure 5. Neural oscillations associated with the trained brain states.** Panels b-f show topographical  
343 representations of the relative power (in % of whole spectrum) in the UP condition minus the DOWN  
344 condition, for 5 distinct frequency bands (Averaged group data,  $n=14$ , 3 other frequency bands shown in  
345 Supplementary Fig 3). Red colours indicate regions that demonstrated greater synchronisation in the UP  
346 condition. Blue colours indicate greater synchronization in the DOWN condition. The location of the  
347 electrode nearest to the TMS hotspot varied between participants but was always within the region  
348 indicated in a). Colours are scaled from blue-red by minimum-maximum (range shown to right of each  
349 plot). Panel g shows the same data (UP-DOWN) extracted for each participant's hotspot electrode.  
350 Values greater than 0 indicate larger amplitude oscillations in the UP condition, and lower than 0 indicate  
351 larger oscillations in the DOWN condition. Stars indicate significant deviations from 0 (Wilcoxon Signed  
352 Rank tests). Panel h shows group level data for regression analyses performed on MEP amplitudes with

353 relative power in each frequency band. This included all 120 trials (60 UP, 60 DOWN) collected during  
354 the combined TMS-EEG recording session. The Y axis depicts the slope of the regression model. Stars  
355 indicate significant deviations from 0 (0 would indicate no slope, Wilcoxon Signed Rank test). Individual  
356 regression plots are shown for one representative participant in Supplementary Fig. 4.

357 Next, we tested whether the amplitude of neural oscillations recorded at the  
358 hotspot at the time of each TMS pulse could predict the amplitude of the resulting  
359 MEPs. For each participant, MEP amplitudes of the 120 trials (60 UP, 60 DOWN) were  
360 entered as the outcome variable in a robust regression model with trial-by-trial relative  
361 power values for each frequency band as predictor variables. Regression slopes (beta  
362 values) for each participant were carried forward into a group level analysis (Fig. 5m),  
363 and Wilcoxon signed rank tests were used to establish whether the slopes were  
364 significantly different from 0 (a 0 slope would indicate no statistical relationship  
365 between predictor and outcome variable). Lower amplitude oscillations in theta  
366 ( $p_{FDR}=0.024$ , Fig.5h), low alpha ( $p_{FDR}<0.001$ ) and high alpha ( $p_{FDR}=0.002$ ) were  
367 predictive of larger MEP amplitudes, and higher amplitude oscillations in low gamma  
368 ( $p_{FDR}=0.020$ ) and high gamma ( $p_{FDR}=0.020$ ) were significant predictors of larger MEP  
369 amplitudes. In a previous study, it was reported that a strong predictor of cortical  
370 excitability was the low gamma : high alpha ratio <sup>3</sup>. We replicated this finding,  
371 demonstrating that this ratio was a significant predictor of MEP amplitude ( $p_{FDR}=0.016$ )  
372 with larger ratios predicting larger MEP amplitudes.

373

#### 374 *EEG data classification*

375

376 We next tested whether the distinction between the two trained states was large enough  
377 that the individual data trials could be successfully predicted as ‘UP’ state or ‘DOWN’  
378 state, using machine learning based solely on the EEG power values (relative power  
379 data, scaled by 1/f transformation, in the 1.5s prior to TMS) of the 8 frequency bands  
380 of interest. A linear support vector machine (SVM) was applied to the data of each  
381 participant (60 UP 60 DOWN epochs). The SVM has been shown to be particularly  
382 powerful on EEG data, which is noisy and contains many features that are correlated.  
383 This approach additionally allowed us to perform feature selection, to quantify which  
384 EEG features most heavily contributed to the distinction between the two states. Using  
385 only data from the electrode closest to the hotspot (8 rhythms plus  
386 LowGamma:HighAlpha ratio) the SVM was capable of classifying the brain states with  
387 an average accuracy of 81.5% ( $\pm 5.1\%$ ) based on 10-fold cross validation which differed

388 significantly ( $p=0.001$ ,  $n=14$ ) from a null model revealed by permutation testing  
389 (accuracy null model:  $49.0\% \pm 13$ ). Additionally, incorporating data from the same  
390 rhythms recorded at the corresponding electrode in the opposite hemisphere increased  
391 this accuracy to  $85.1\% (\pm 4.6\%)$  across participants (see Supplementary Table 1). Using  
392 feature ranking based on Recursive Feature Elimination (RFE), taking the mode of the  
393 top ranked features across participants revealed that the strongest contribution to the  
394 high classification accuracy of the latter SVM was the High Gamma rhythm in the  
395 hotspot electrode, followed by High Alpha at the hotspot, then the  
396 LowGamma:HighAlpha ratio (for full ranking order see Supplementary Table 1).

397

398

399

400

401

402

### 403 **Discussion**

404

405 Here we aimed to uncover neural activity evoked by voluntarily facilitating or  
406 suppressing excitability within sensorimotor circuits, while keeping motor output and  
407 sensory feedback constant. We show that using a bidirectional TMS-neurofeedback  
408 approach is critical to gain volitional control over MEP amplitudes, a skill that is  
409 retained for at least 6 months without further training. This voluntary state-setting with  
410 a large dynamic range is causally related to modulating pre-synaptic GABA<sub>B</sub> mediated  
411 disinhibition and to a prominent increase of gamma power in sensorimotor cortex for  
412 the UP state which was accompanied by a clear reduction of power in the theta, low  
413 and high alpha bands.

414

415 Previous studies have shown that it is possible to gain voluntary control over  
416 activity in the central nervous system if appropriate neurofeedback is embedded in a  
417 reinforcement learning task, with food rewards for animals<sup>14,15</sup> and visually rewarding  
418 stimuli for humans<sup>19,29</sup>. Here we confirm that this approach is also suitable for learning  
419 how corticomotor excitability can be bidirectionally up- or down-regulated. Our  
420 participants were initially familiarized with two motor imagery strategies which are  
421 known to modulate corticospinal excitability in the required manner<sup>29-32</sup>. Learning,  
422 however, indicated by progressively stronger dissociation between the UP and the  
423 DOWN state, only took place when direct low-latency feedback regarding the MEP

424 amplitude was provided. After training, participants were able to modulate  
425 corticomotor excitability across a large range so that MEP amplitudes were  
426 approximately twice as large during the UP than the DOWN condition. UP training, in  
427 particular, resulted in an 83.8% increase of MEP amplitudes from baseline, while  
428 downregulation of MEP amplitude was possible <sup>eg. see 29</sup> but more difficult (30.6%  
429 decrease from baseline). Once acquired, volitional control of corticomotor excitability  
430 was retained for at least 6 months and could be performed even without online feedback  
431 indicating true, long-term learning <sup>33</sup>.

432

433       Once participants could control their corticomotor excitability, we uncovered the  
434 electrophysiological underpinnings by applying measurements that were independent  
435 of the feedback modality (single pulse TMS) and investigated whether there were  
436 differences between the UP versus DOWN state. This approach cancelled out the  
437 effects that were common to both mental strategies, isolating the mechanisms  
438 underlying the MEP modulation. This revealed two key novel electrophysiological  
439 findings, involving presynaptic GABA<sub>B</sub> disinhibition, and gamma oscillations.  
440 Additionally, the pronounced changes of cortical physiology despite the absence of  
441 EMG activity or changes in sensory input suggests that the increase vs decrease of  
442 corticomotor excitability was -a least partly- of cortical origin rather than mediated by  
443 spinal cord mechanisms.

444

445

446       The UP state was associated with a significant increase of LCD while other  
447 measurements probing inhibitory M1 circuits failed to reveal differential effects for the  
448 UP versus DOWN state. LCD is thought to represent a read-out of the presynaptic self-  
449 inhibition of GABAergic neurons which is thought to be mediated by extrasynaptic  
450 GABA<sub>B</sub> auto-receptors<sup>34,35</sup>. This mechanism is hypothesized to result in a net  
451 facilitatory effect as observed during the UP condition in our study. Previously, LCD  
452 was found to be elevated during motor imagery (MI), but this increase relative to rest  
453 was observed irrespective of whether participants imagined voluntarily activating or  
454 relaxing hand muscles <sup>36</sup>. However, this investigation was conducted in a single  
455 session, and did not employ neurofeedback, so MEP modulation by these two  
456 imagination conditions could be expected to be substantially smaller than observed in  
457 our study, particularly for the voluntary relaxation condition which had a similar

458 excitability state as the rest condition. Thus, it is possible that the clear modulation of  
459 LCD observed here only manifested after neurofeedback training, i.e. when the two  
460 excitability states became clearly distinct. It is important to note here that in our  
461 protocol, LCD was detected only during the UP state and not at rest. In our search  
462 procedure to decide upon the optimum conditioning stimulus (CS) intensities, we  
463 prioritized SICI and LICI, finding a CS intensity that elicited as close to 50% inhibition  
464 of the test MEP as possible. We tested intensities between 106-114% RMT for LICI  
465 (and above or below this if no appropriate inhibition was found), and applied these also  
466 to LCD (such that the only difference between the LCD and LICI protocols was the  
467 ISI). This may have simply been too low to consistently elicit LCD, which appears to  
468 be more robustly evoked at higher intensities<sup>27,37</sup> or during mild contraction<sup>38</sup>, and is  
469 not observed in all individuals<sup>37</sup>. It may also be that LCD is more readily observed  
470 using triple pulse procedures in which disinhibition can more directly be measured by  
471 the reduction of SICI following a priming stimulus<sup>35,37,39</sup>. The increase in MEP  
472 amplitude observed in the TMS-feedback induced UP state, may also be related to the  
473 increase in I-wave recruitment that has been reported during LCD<sup>26</sup> and suggests that  
474 further research into this effect is warranted, with parameters more specifically tailored  
475 to investigate LCD.

476

477

478 We observed significant modulation of the alpha and gamma rhythms close to  
479 M1 of the trained hemisphere. Focusing on data from the recording electrode closest to  
480 each individual's hotspot revealed a significant association between low alpha and high  
481 gamma power for the UP versus DOWN state. Trial-by-trial modulation of these  
482 rhythms correlated significantly with MEP amplitude, and a support vector machine  
483 (SVM) classifying the two states based on EEG data ranked the high gamma and high  
484 alpha band as the two top features characterizing the distinction. Our observation of  
485 reciprocal changes in the alpha and gamma band are in line with previous studies using  
486 transcranial as well as intracranial recording methods<sup>1</sup>. The 'pulsed inhibition' theory  
487 suggests that repeated bursts of inhibitory alpha activity serve to temporarily silence  
488 gamma oscillations<sup>1</sup>. Thus, these two rhythms are seen to exhibit a reciprocal  
489 relationship, whereby when alpha is high, gamma is low. In periods of high alpha,  
490 gamma may still burst periodically, but only at the troughs of the oscillation cycle,  
491 meaning that the gamma 'duty cycle' (window for neural processing) is short, and only

492 brief messages can be sent. By contrast, in periods of low alpha power, the gamma duty  
493 cycle is longer, and more extensive neuronal processing and inter-regional  
494 communication may occur. Our finding of increased gamma activity is also consistent  
495 with previous animal literature, showing that the pharmacological removal of GABA<sub>B</sub>-  
496 mediated inhibition (by receptor blockage) in rats results in increased gamma  
497 oscillations<sup>40</sup> which have been shown to be largest in M1's layer V<sup>41</sup>.

498

499         Gamma has often been considered difficult to detect using scalp electrodes  
500 because it is highly localised<sup>42</sup> and may also reflect non-cortical sources when recorded  
501 with EEG<sup>43,44</sup>. However, it is tempting to speculate that, in our experiment, gamma  
502 activity was strongly synchronized as a consequence of the neurofeedback training,  
503 where participants learned to substantially facilitate corticomotor excitability while  
504 keeping EMG activity constant, such that EMG amplitude differed only minimally  
505 between the UP and DOWN conditions. This suggestion is in line with previous  
506 neurofeedback studies that provided direct feedback of gamma activity, showing that  
507 gamma power could be upregulated to a substantial amount which even exceeded  
508 power values observed during movement execution<sup>15,45</sup>. By keeping the visual feedback  
509 for the two conditions identical, we ensured that differences in eye movements between  
510 the UP and DOWN states were minor. As we were particularly interested in gamma  
511 oscillations, we additionally performed all EEG recordings in an electromagnetically  
512 shielded room, using a gel-based electrode system to maximize signal to noise ratio.

513

514         Previous studies have taken a correlational approach to investigating the  
515 relationships between brain rhythms and corticomotor excitability. These have shown  
516 that low alpha<sup>4,46</sup> or beta power<sup>47</sup> as well as high gamma power<sup>3</sup> during natural  
517 fluctuations at rest are associated with larger MEP amplitudes. We confirm and extend  
518 these results by introducing causality to this relationship for the first time, showing that  
519 experimentally driving excitability into two distinct states causes specific patterns of  
520 neural dynamics in the volitionally controlled cortical area.

521

522         While changes in alpha and gamma were specific to the hemisphere from which  
523 feedback was provided, theta showed a bilateral pattern of modulation, being higher in  
524 the DOWN than the UP state in motor areas in both hemispheres. While mid-frontal



525 theta activity has been linked to error monitoring<sup>48</sup> the role of lateralized theta activity  
526 close to the sensorimotor hotspot electrode and its symmetric counterpart is less clear.  
527 Slower rhythms exert effects over larger distances, and are thought to be involved in  
528 long-range communication<sup>42</sup>. A similar pattern of upregulation and downregulation  
529 was observed in the homologous muscle in the opposite limb, albeit weaker and not  
530 statistically significant. This is likely a reflection of the extensive transcallosal  
531 structural connectivity and functional coupling of homologous regions of the cortical  
532 motor network<sup>49-51</sup>. It is tempting to speculate that the bilateral theta activity observed  
533 in the current study served to regulate the inhibition/facilitation of functional coupling  
534 or ‘spillover’ of activation from motor areas in the target hemisphere to their  
535 homologous counterparts.

536

537

538 Surprisingly we did not observe differential modulation of the Beta band, which  
539 is the predominant oscillatory frequency in sensorimotor cortical regions<sup>52,53</sup>. It  
540 typically desynchronizes (together with alpha) during motor execution and motor  
541 imagery<sup>54-57</sup> and has been associated with corticomotor excitability at rest<sup>3</sup>. As our  
542 results represent the direct contrast between the UP and DOWN states, the lack of Beta  
543 involvement may firstly be due to the fact that both conditions involved a mental  
544 strategy targeted at the sensorimotor system and, secondly, that no temporal structure  
545 was imposed so that we could not perform analyses which are, for example, time-locked  
546 to the potential onset of these mental strategies. However, our data further confirm that  
547 the two ‘inhibitory’ rhythms alpha and beta might serve different functions in selecting  
548 and activating the appropriate sensorimotor representations<sup>58</sup>.

549

550

551 Here we present an innovative approach to voluntarily and bidirectionally  
552 change the state of the motor cortex, by directly targeting MEP amplitudes in a  
553 neurofeedback paradigm. This method provided a unique opportunity to reveal the  
554 oscillatory and neurochemical underpinnings of the two distinct trained brain states,  
555 using concurrent TMS EEG measurements, and mechanistic follow-up investigations  
556 using paired-pulse TMS. The results comparing UP and DOWN states indicate that  
557 voluntary upregulation of corticomotor excitability causes increased presynaptic

558 GABA<sub>B</sub>-mediated disinhibition, elevated neural oscillations in the gamma frequency  
559 range, and reduced alpha and theta rhythms.

560 This paves the way for new technologies that allow the user to regulate aspects  
561 of their own brain function in order to reach desired states that are, for example,  
562 associated with enhanced motor performance. In the context of stroke rehabilitation,  
563 training volitional modulation of corticomotor excitability may hold promise as a  
564 rehabilitative therapy early after stroke, i.e. when patients are deprived of rehabilitation  
565 training because they are unable to execute overt movements with the impaired upper  
566 limb. As it is known that LCD is recruited during actual movement<sup>28,59,60</sup>, the elevated  
567 LCD we observed in the UP condition may reflect that the neurofeedback had engaged  
568 similar mechanisms to those involved in movement execution, using only voluntary  
569 endogenous processes. Furthermore, as pathological hyperexcitability of the non-  
570 damaged hemisphere has been hypothesized to limit recovery in some patients<sup>61</sup>, the  
571 TMS-neurofeedback protocol can be individually tailored either to upregulate the  
572 damaged hemisphere, down-regulate the intact hemisphere, or a combination of both,  
573 depending on the patient's specific needs.

574

575

576

577

578

## 579 **Materials and Methods**

580

### 581 *Participants*

582

583 Fifteen healthy volunteers (age 23± 3.14 s.d, 7 female) participated in the  
584 experimental group. An additional thirteen participants (age 25± 3.06 s.d, 3 female)  
585 formed a control group. All participants were right handed according to the Edinburgh  
586 Handedness Inventory<sup>62</sup>, and gave informed consent to procedures. The experiments  
587 were approved by the Kantonale Ethikkommission Zürich, and were conducted in  
588 accordance with the Declaration of Helsinki (1964).

589

590

### 591 *TMS-based neurofeedback*

592

593 Participants undertook five sessions of TMS-based neurofeedback, on separate  
594 days. The first four days comprised of neurofeedback training, and on the fifth day  
595 neurofeedback was performed with simultaneous electroencephalography (EEG)  
596 recording to investigate state specific neural dynamics. On two of the training days  
597 neurofeedback was adjusted so that a rewarding visual stimulus was displayed when  
598 MEPs were larger than baseline (the ‘UP’ condition) and on the other two days, the  
599 rewarding stimulus was displayed when MEPs were smaller than baseline (the  
600 ‘DOWN’ condition). On each of the training days, 4 separate blocks of neurofeedback  
601 were performed, each comprising of 30 individual MEP feedback trials (total 120 trials  
602 per day). The format of individual trials and feedback is described in more detail below.  
603 Baseline corticospinal excitability was measured on each day prior to training (20  
604 MEPs) and post-measurements were taken during the rest periods between each of the  
605 4 blocks (12 MEPs per measurement).

606

607 Subjects sat in a comfortable chair with both arms and legs resting in a neutral  
608 position supported by foam pillows. Surface electromyography (EMG, Trigno  
609 Wireless; Delsys) was recorded from right First Dorsal Interosseous (FDI), Abductor  
610 Digiti Minimi (ADM), Opponens Pollicis (OP), and left FDI. EMG data were sampled  
611 at 2000Hz (National Instruments, Austin, Texas), amplified and stored on a PC for off-  
612 line analysis.

613 TMS was performed with a figure-of-eight coil (internal coil diameter 50mm)  
614 connected to a Magstim 200 stimulator (Magstim, Whitland, UK). The coil was held  
615 on the left hemisphere over the ‘hotspot’ of the right FDI at the location with the largest  
616 and most consistent MEPs, and with the optimal orientation for evoking a descending  
617 volley in the corticospinal tract (approximately 45 degrees from the sagittal plane in  
618 order to induce posterior-anterior current flow). Once the hotspot was established, the  
619 lowest stimulation intensity at which MEPs with peak-to-peak amplitude of  
620 approximately 50 $\mu$ V were evoked in at least 5 of 10 consecutive trials was taken as  
621 Resting Motor Threshold (RMT).

622 The stimulation intensity used to evoke MEPs during the experiment was chosen  
623 using the following procedure in order to obtain a baseline MEP amplitude that was  
624 50% of the participant’s maximum. A recruitment curve <sup>eg. 63</sup> was performed at the

625 beginning of the first experimental session, whereby 6 TMS pulses were applied at 10  
626 different intensities relative to RMT (90%, 100%, 110%, 120%, 130%, 140%, 150%,  
627 160%, 180%, 190%) in a randomized order. MEP amplitude at each intensity was  
628 plotted to determine the point on the curve at which plateau occurs and the MEPs do  
629 not continue to increase. Maximal MEP amplitude was recorded, and the intensity  
630 required to evoke 50% of this amplitude was used for all subsequent testing. With this  
631 approach, there was scope for MEP amplitude to both increase and decrease to similar  
632 extents from this ‘intermediate’ value. Post-hoc analyses revealed that this procedure  
633 resulted in an average stimulation intensity corresponding to 130% RMT. Immediately  
634 following this procedure and prior to the first block of neurofeedback, 20 MEPs were  
635 collected at rest at the chosen intensity to determine ‘baseline’ corticospinal  
636 excitability. The mean MEP amplitude at baseline was recorded and used during  
637 neurofeedback to establish the criterion amplitude that determined whether participants  
638 received either positive or negative feedback.

#### 639 *Format of neurofeedback*

640 Neurofeedback was performed using custom written MATLAB software.  
641 Participants kept eyes open with attention directed to a monitor in front of them. They  
642 were instructed to relax their limbs and avoid tensing any muscles throughout the  
643 experiment. In order to ensure that MEP amplitude could not be influenced by  
644 background muscle activation, the root mean square (rms) of the EMG signal for each  
645 muscle for the previous 100ms of data was calculated and displayed in real-time on  
646 screen at the beginning of each trial in the form of four coloured ‘traffic lights’,  
647 representing each muscle (Fig. 1A). If the background EMG in a muscle exceeded  $7\mu\text{V}$ ,  
648 the corresponding light turned red. Participants were instructed that a trial could not  
649 begin unless all four lights were green (all muscles relaxed below  $7\mu\text{V}$ ) for at least a  
650 continuous 500ms period. When a trial commenced the traffic lights disappeared, but  
651 background EMG continued to be monitored and the trial was automatically paused if  
652 any muscle exceeded the threshold. At the beginning of each trial a fixation cross  
653 appeared in the center of the screen. After a variable period of time (between 5.5 - 8.5  
654 seconds, or longer if muscle activation delayed the trial) a TMS pulse was fired. The  
655 MEP amplitude for the target muscle (right FDI) was immediately measured and  
656 displayed to the participant on screen within 500ms. The display consisted of a vertical

657 bar indicating MEP amplitude relative to a horizontal line in the middle of the screen  
658 representing the mean recorded at baseline (Fig. 1B). In ‘UP’ sessions if the MEP was  
659 larger than the criterion amplitude, the bar was shown as green with a tick beside it, a  
660 positive soundbyte was heard, and a number adjacent to a dollar sign incremented to  
661 indicate that a small financial reward had been gained. If the MEP was smaller than the  
662 criterion amplitude, the bar was red with a cross beside it, a negative soundbyte was  
663 heard, and no financial reward was shown. The reverse was true in the ‘DOWN’  
664 sessions (Fig. 1C). The feedback remained on screen for 4 seconds, before being  
665 replaced by the traffic lights display preceding the next trial. Participants were  
666 instructed to attend to the feedback and that the goal was to increase (or decrease) the  
667 size of the MEP represented by the bar. Prior to the experiment participants read an  
668 instruction sheet explaining the procedures above and providing recommended mental  
669 strategies that were reported in previous literature in which corticospinal excitability  
670 was downregulated<sup>29</sup> and upregulated<sup>31</sup> by motor imagery (Specific task instructions  
671 are provided in Supplementary Material). Initially the criterion amplitude corresponded  
672 to the baseline MEP measure. After each block of 30 MEPs, performance was  
673 quantified and the task difficulty was adjusted if necessary. If the success rate was  
674 >70% difficulty was increased by raising (or lowering in the DOWN condition) the  
675 criterion MEP amplitude that needed to be reached by 10% in order for the positive  
676 reward to be presented. If performance was > 90%, this was adjusted by 20%.

#### 677 *EEG session*

678

679 On the fifth day neurofeedback was provided during simultaneous EEG  
680 recording. The participant’s TMS hotspot was determined and marked on the scalp  
681 prior to EEG capping. EEG signals were recorded using a 64 channel gel-based TMS-  
682 compatible cap (Electrical Geodesics Inc., Oregon, USA), and the channel closest to  
683 the TMS hotspot was noted. EEG data were amplified and sampled at 1000hz. In order  
684 to minimize artefacts associated with the direct contact of the TMS coil resting on the  
685 electrodes of the EEG cap, we designed and 3D-printed a custom plastic ‘coil spacer’  
686 device<sup>64</sup>, which has four wide legs positioned to provide a platform distributing the  
687 weight of the TMS coil, so that it hovers over the electrodes without contact (Fig. 1D).  
688 This allowed quality recordings to be obtained even from the channel of interest closest  
689 to the participant’s ‘hotspot’. The participants RMT was established while wearing the

690 EEG cap with TMS coil spacer, and the same % above threshold that was used for all  
691 previous sessions was applied for neurofeedback. Impedances were monitored  
692 throughout and maintained below 50k $\Omega$ .

693

694 Baseline corticospinal excitability was measured in the same fashion as for the  
695 first four sessions, followed by two blocks of neurofeedback (UP or DOWN,  
696 counterbalanced) with brief (12 MEP) post measurements following each. After the  
697 final post measurement, a 15 minute rest break was scheduled for the participant.  
698 Following this, the procedure was repeated and baseline excitability was measured  
699 again, followed by two blocks of either UP or DOWN neurofeedback (whichever was  
700 not performed in the first half of the session). At the end of this session participants  
701 were debriefed.

702

703 *Control group*

704

705 Participants were blinded as to whether they were allocated to the experimental  
706 or control group. The control group experienced identical conditions to the  
707 experimental group, with the exception that direct neurofeedback was not provided.  
708 The visual feedback bar demonstrating MEP amplitude was always the same height  
709 (reaching the ‘mean’ horizontal line). ‘Positive’ feedback/rewards were presented in  
710 the same proportion as in the experimental group (66% of all trials - calculated upon  
711 completion of experimental group), but at a fixed and predicable rate in order to prevent  
712 the development of illusory correlations. Participants were instructed to attend to the  
713 visual feedback on screen, and that rewards would occur at a fixed rate. Aside from  
714 this, they were otherwise given identical instructions as the participants in the  
715 experimental group- i.e. the same recommended mental strategies were provided on  
716 control ‘UP’ and ‘DOWN’ blocks.

717

718 ***Data processing and analysis***

719

720 *MEP data*

721

722 EMG data from all four hand muscles were band-pass filtered (30–800 Hz),  
723 separately for the portion of data containing the 100ms of ‘pre-TMS’ background EMG,  
724 and for the portion of EMG containing the MEP, in order to prevent smearing of the

725 MEP into the background EMG data chunk. The root mean squared (rms) of the  
726 background EMG was calculated, and peak-peak MEP amplitude was measured.  
727 Trimming (removal) of the maximum and minimum MEP in each block was performed  
728 in order to screen out extreme values. MEP amplitude is known to be modulated by  
729 EMG background activation<sup>23,24</sup>. Therefore, the rms pre-stimulus EMG recordings  
730 were used to assess the presence of unwanted background EMG activity in the period  
731 110 to 10ms preceding the magnetic pulse. MEPs preceded by background EMG higher  
732 than 0.01mV were excluded. For each subject and over all trials we calculated the mean  
733 and standard deviation of the background EMG. MEPs that occurred when the  
734 background EMG value exceeded 2.5 standard deviations above the mean, and MEPs  
735 with a peak-to-peak amplitude which exceeded  $Q3 + 1.5 \times (Q3 - Q1)$  were removed  
736 from further analysis, with Q1 denoting the first quartile and Q3 the third quartile  
737 computed over the whole set of trials for each subject.

738

739 Inferential statistics were computed using Mixed Effects Models in SPSS (Version  
740 16.0, SPSS Inc. Chicago, US), as they account for covariances between related data  
741 samples in repeated measures designs, and have greater flexibility for modeling effects  
742 over time than traditional ANOVA approaches<sup>65</sup>. Fitting of the mixed effects models  
743 employed restricted maximum likelihood estimation (REML) and a compound  
744 symmetry covariance matrix. Model fit indices (Akaike Information Criterion and  
745 Schwarz Bayesian Criterion) were considered prior to choosing the covariance matrix  
746 and model type. Fixed effects were *neurofeedback type* (UP or DOWN) and *block*  
747 *number* (1-10). The influence of each of the fixed effects on the model was estimated  
748 using *F* tests. In all models *subject* was designated as a random effect with random  
749 intercepts.

750 The criterion alpha value was set to 0.05 for all inferential tests. In cases where  
751 multiple comparisons were performed, *p* values were false discovery rate (FDR)  
752 corrected.

753

754

755 *EEG data*

756

757 Signals from all 64 channels were first epoched to extract only the data on each  
758 trial from the 4 seconds before the TMS pulse. This was to remove the substantial

759 artefacts that arise during the magnetic pulses, prior to conducting any filtering or  
760 further processing. These separate chunks of unpolluted data were then concatenated  
761 into one continuous epoch, and highpass filtered at 1Hz, prior to conducting an  
762 independent components analysis (ICA). Independent components were visualized and  
763 those containing artefacts arising from eye movements, facial EMG, cardiac signals,  
764 bad channels or other non-brain activity related signals were removed.

765 The cleaned data were average-referenced, and re-epoched into chunks of data  
766 containing only the 1.5s on each trial prior to the TMS pulse (ie. to capture the ongoing  
767 oscillatory activity at the instance in which the TMS occurred, while the fixation cross  
768 was on screen and the ‘traffic lights’ had disappeared).

769 A power spectrum was computed (Welch periodogram/FFT) for each single epoch and  
770 the mean power (and relative power) in each of the relevant bandwidths were extracted  
771 (delta (0.1-4Hz), theta (5-7Hz), low alpha (8-10Hz), high alpha (11-13Hz), low beta  
772 (14-21Hz), high beta (22-30Hz), low gamma (31-50Hz) and high gamma (51-80Hz).  
773 Power values were computed separately for UP and DOWN trials, and non-parametric  
774 Wilcoxon signed rank tests (with FDR correction) were used to compare neural  
775 oscillations in these two states.

776

777 We also analysed whether trial-by-trial variation of EEG data was associated with trial-  
778 by-trial variation of MEP amplitudes. Therefore, relative power in each bandwidth for  
779 each epoch was entered into a multiple regression model with MEP amplitudes  
780 measured in the muscle from which neurofeedback was provided (right FDI). The beta  
781 (slope) values resulting from each regression model for each participant were  
782 forwarded into a group-level analysis.

783

#### 784 *Classification of distinct brain states*

785

786 Individual epochs of EEG data (60 UP 60 DOWN) were classified by a linear support  
787 vector machine (SVM, 10-fold cross validation), to test separately for each participant  
788 whether the epochs could be successfully predicted as ‘UP’ state or ‘DOWN’ state  
789 based solely on the power values (scaled by using 1/f transformed relative power) of  
790 the 4 frequency bands of interest. The SVM was chosen as it is known to perform  
791 particularly well in BCI settings using EEG data which is noisy and has features that  
792 are correlated. In order to validate the results the same procedure was repeated with  
793 randomly permuted labels, and this null model was statistically compared to the model



794 with true labels ( $C=1$ ). Feature selection was conducted using feature ranking based on  
795 Recursive Feature Elimination <sup>66</sup>.

796

797

798 *Follow-up experiment 6 months later*

799

800 A sub-set of 11 participants from the experimental group returned approximately 6  
801 months later to participate in a follow-up experiment probing retention and mechanisms  
802 underlying the two distinct states. This was conducted over a further 4 days of testing.  
803 On one day, retention, aftereffects, and excitability in the opposite ‘untrained’  
804 hemisphere were tested for the ‘UP’ condition. On another, neurophysiological  
805 mechanisms were probed using paired pulse TMS. These two days were repeated for  
806 the ‘DOWN’ condition, and the order of these sessions was counterbalanced. We  
807 additionally tested whether trained participants were able to upregulate and  
808 downregulate when feedback was temporarily removed.

809

810 *Retention testing & aftereffects measurement*

811 After a 6-month break and no top-up training, participants were tested with one block  
812 of TMS-neurofeedback (20 MEPs) in order to assess retention of learning. All other  
813 procedures were identical to those carried out in the main experiment.

814 Following this block, 12 MEPs were collected at rest after 5 and 10 minutes.

815

816 *Excitability in the opposite hemisphere*

817

818 During one block, two TMS coils were used, placed over the right and left motor  
819 hotspots (as described previously). This block contained 40 trials, 20 of which were  
820 normal TMS neurofeedback trials. The other 20 were trials where TMS was applied to  
821 the opposite hemisphere, rather than to the hemisphere that was the target for  
822 neurofeedback. No feedback was given in these trials. The presentation of left and right  
823 hemisphere TMS pulses was randomized.

824

825 *Feedback-free measurements*

826

827 We additionally tested whether trained participants were able to upregulate and  
828 downregulate when feedback was temporarily removed. In this feedback-free block,

829 the timing of trials and participant instructions were identical to normal neurofeedback  
830 blocks, but in place of the usual feedback bar showing MEP amplitude, the white  
831 fixation cross simply turned red during this period. The onset of trials was still  
832 contingent on muscles being completely relaxed, and the traffic lights display still  
833 preceded every trial.

834

### 835 *Paired pulse TMS measurements*

836

837 On separate days (one ‘UP’ one ‘DOWN’) from the measurements described above, we  
838 performed three additional blocks of TMS neurofeedback (24 trials per block x 3 = 72  
839 total trials), in which just 25% of trials were standard single pulse TMS-neurofeedback  
840 trials, with the usual feedback. The remaining trials contained paired pulses in place of  
841 the usual single pulse TMS. For all paired pulse measurements, the test stimulus  
842 intensity was identical to that which had been chosen for the TMS neurofeedback (ie.  
843 that produced MEPs that were 50% of the maximum on the recruitment curve). On 25%  
844 of trials Short Interval Intracortical Inhibition (SICI) was measured. This was with a  
845 conditioning stimulus intensity that was chosen using a personalized search procedure  
846 testing intensities ranging from 50%-90% RMT, to achieve as close to 50% inhibition  
847 as possible, and an inter-stimulus interval of 1.97ms<sup>67</sup>. The reduction in the size of the  
848 test MEP is believed to represent postsynaptic GABA<sub>A</sub> inhibition<sup>25</sup>. On 25% of trials  
849 Long Interval Intracortical Inhibition (LICI) was measured. This was with two  
850 suprathreshold pulses, with the conditioning stimulus intensity chosen using a search  
851 procedure between 106-114% RMT, and an inter-stimulus interval of 100ms<sup>27</sup>. This is  
852 believed to reflect postsynaptic GABA<sub>B</sub> inhibition<sup>68</sup>. On the remaining 25% of trials,  
853 Late Cortical Disinhibition (LCD) was tested. This was with the exact same pulse  
854 intensities as used for LICI, but with a 220ms inter-stimulus interval<sup>27</sup>, and is thought  
855 to measure presynaptic GABA<sub>B</sub> disinhibition<sup>26-28</sup>. The order of presentation of paired  
856 pulses and single pulses was randomized.

857

858 Baseline measurements were taken at rest with each of these three paired-pulse TMS  
859 protocols, prior to the beginning of neurofeedback blocks (20 of each type of paired  
860 pulse measurement, and 20 single pulse MEPs).

861

862

863 1

864

865 **REFERENCES**

866

- 867 1. Jensen, O. & Mazaheri, A. Shaping Functional Architecture by  
868 Oscillatory Alpha Activity: Gating by Inhibition. *Frontiers in human*  
869 *neuroscience* **4**, (2010).
- 870 2. Jensen, O. *et al.* Using Brain–Computer Interfaces and Brain-State  
871 Dependent Stimulation as Tools in Cognitive Neuroscience. *Front*  
872 *Psychol* **2**, (2011).
- 873 3. Zarkowski, P., Shin, C. J., Dang, T., Russo, J. & Avery, D. EEG and the  
874 Variance of Motor Evoked Potential Amplitude. *Clinical EEG and*  
875 *Neuroscience* **37** (3) 247-251 (2006).
- 876 4. Sauseng, P., Klimesch, W., Gerloff, C. & Hummel, F. C. Spontaneous  
877 locally restricted EEG alpha activity determines cortical excitability in  
878 the motor cortex. *Neuropsychologia* **47**, 284–288 (2009).
- 879 5. Schaworonkow, N., Triesch, J., Ziemann, U. & Zrenner, C. EEG-  
880 triggered TMS reveals stronger brain state-dependent modulation of  
881 motor evoked potentials at weaker stimulation intensities. *bioRxiv*  
882 251363 (2018). doi:10.1101/251363
- 883 6. Kelly, S. P., Gomez-Ramirez, M. & Foxe, J. J. The strength of  
884 anticipatory spatial biasing predicts target discrimination at attended  
885 locations: a high-density EEG study. *Eur. J. Neurosci.* **30**, 2224–2234  
886 (2009).
- 887 7. Mazaheri, A., Nieuwenhuis, I. L. C., van Dijk, H. & Jensen, O.  
888 Prestimulus alpha and mu activity predicts failure to inhibit motor  
889 responses. *Hum Brain Mapp* **30**, 1791–1800 (2009).
- 890 8. Schubert, R., Blankenburg, F., Lemm, S., Villringer, A. & Curio, G. Now  
891 you feel it--now you don't: ERP correlates of somatosensory awareness.  
892 *Psychophysiology* **43**, 31–40 (2006).
- 893 9. Zaehle, T., Rach, S. & Herrmann, C. S. Transcranial alternating current  
894 stimulation enhances individual alpha activity in human EEG. *PLoS ONE*  
895 **5**, e13766 (2010).
- 896 10. Buch, E. *et al.* Think to move: a neuromagnetic brain-computer interface  
897 (BCI) system for chronic stroke. *Stroke* **39**, 910–917 (2008).
- 898 11. Caria, A. *et al.* Chronic stroke recovery after combined BCI training and  
899 physiotherapy: A case report. *Psychophysiology* **48**, 578–582 (2010).
- 900 12. Soekadar, S. R., Birbaumer, N., Slutzky, M. W. & Cohen, L. G. Brain–  
901 machine interfaces in neurorehabilitation of stroke. *Neurobiology of*  
902 *Disease* **83**, 172–179 (2015).
- 903 13. Maulden, S. A., Gassaway, J., Horn, S. D., Smout, R. J. & DeJong, G.  
904 Timing of Initiation of Rehabilitation After Stroke. *Arch Phys Med*  
905 *Rehabil* **86**, 34–40 (2005).
- 906 14. Fetz, E. E. Volitional Control of Cortical Oscillations and Synchrony.  
907 *Neuron* **77**, 216–218 (2013).

- 908 15. Engelhard, B., Ozeri, N., Israel, Z., Bergman, H. & Vaadia, E. Inducing  
909 Gamma Oscillations and Precise Spike Synchrony by Operant  
910 Conditioning via Brain-Machine Interface. *Neuron* (2013).
- 911 16. Mellinger, J. *et al.* An MEG-based brain-computer interface (BCI).  
912 *Neuroimage* **36**, 581–593 (2007).
- 913 17. Soekadar, S. R., Witkowski, M., Birbaumer, N. & Cohen, L. G.  
914 Enhancing Hebbian Learning to Control Brain Oscillatory Activity.  
915 *Cerebral Cortex* **83**, 172-179 (2014). doi:10.1093/cercor/bhu043
- 916 18. Sitaram, R. *et al.* Closed-loop brain training: the science of  
917 neurofeedback. *Nat Rev Neurosci* **18**, 86–100 (2017).
- 918 19. Thompson, A. K., Chen, X. Y. & Wolpaw, J. R. Acquisition of a Simple  
919 Motor Skill: Task-Dependent Adaptation Plus Long-Term Change in the  
920 Human Soleus H-Reflex. *J. Neurosci.* **29**, 5784–5792 (2009).
- 921 20. Fries, P. A mechanism for cognitive dynamics: neuronal communication  
922 through neuronal coherence. *Trends Cogn. Sci. (Regul. Ed.)* **9**, 474–480  
923 (2005).
- 924 21. Grosse-Wentrup, M., Schölkopf, B. & Hill, J. Causal influence of gamma  
925 oscillations on the sensorimotor rhythm. *Neuroimage* **56**, 837–842  
926 (2011).
- 927 22. Carson, R. G., Ruddy, K. L. & McNickle, E. *Progress in Motor Control;*  
928 *Theories and Translations* (eds Laczko, J. & Latash, M.L) ISBN 978-3-  
929 319-47312-3 (Springer International Publishing AG).
- 930 23. Hess, C. W., Mills, K. R. & Murray, N. M. Magnetic stimulation of the  
931 human brain: facilitation of motor responses by voluntary contraction of  
932 ipsilateral and contralateral muscles with additional observations on an  
933 amputee. *Neurosci Lett* **71**, 235–240 (1986).
- 934 24. Devanne, H., Lavoie, B. A. & Capaday, C. Input-output properties and  
935 gain changes in the human corticospinal pathway. *Exp Brain Res* **114**,  
936 329–338 (1997).
- 937 25. Fisher, R. J., Nakamura, Y., Bestmann, S., Rothwell, J. C. & Bostock, H.  
938 Two phases of intracortical inhibition revealed by transcranial magnetic  
939 threshold tracking. *Exp Brain Res* **143**, 240–248 (2002).
- 940 26. Cash, R. F. H., Ziemann, U. & Thickbroom, G. W. Inhibitory and  
941 disinhibitory effects on I-wave facilitation in motor cortex. *Journal of*  
942 *Neurophysiology* **105**, 100–106 (2011).
- 943 27. Cash, R. F. H., Ziemann, U., Murray, K. & Thickbroom, G. W. Late  
944 cortical disinhibition in human motor cortex: a triple-pulse transcranial  
945 magnetic stimulation study. *Journal of Neurophysiology* **103**, 511–518  
946 (2010).
- 947 28. Caux-Dedeystère, A., Derambure, P. & Devanne, H. Late cortical  
948 disinhibition in relaxed versus active hand muscles. *Neuroscience* **298**,  
949 52–62 (2015).
- 950 29. Majid, D. S. A., Lewis, C. & Aron, A. R. Training voluntary motor  
951 suppression with real-time feedback of motor evoked potentials. *Journal*  
952 *of Neurophysiology* **113**, 3446–3452 (2015).
- 953 30. Stinear, C. M., Byblow, W. D., Steyvers, M., Levin, O. & Swinnen, S. P.  
954 Kinesthetic, but not visual, motor imagery modulates corticomotor  
955 excitability. *Exp Brain Res* **168**, 157–164 (2005).
- 956 31. Izumi, S. *et al.* Facilitatory effect of thinking about movement on motor-  
957 evoked potentials to transcranial magnetic stimulation of the brain.

- 958 *American Journal of Physical Medicine & Rehabilitation* **74**, 207–213  
959 (1995).
- 960 32. Fadiga, L. *et al.* Corticospinal excitability is specifically modulated by  
961 motor imagery: a magnetic stimulation study. *Neuropsychologia* **37**, 147–  
962 158 (1998).
- 963 33. Magill, R. *Motor Learning and Control: Concepts and Applications*.  
964 (McGraw-Hill Education, 2010).
- 965 34. Mott, D. D. & Lewis, D. V. Facilitation of the induction of long-term  
966 potentiation by GABAB receptors. *Science* **252**, 1718–1720 (1991).
- 967 35. Sanger, T. D., Garg, R. R., Chen, R. Interactions between two different  
968 inhibitory systems in the human motor cortex. *J Physiol* **530**, 307–317  
969 (2001). doi:10.1111/j.1469-7793.2001.03071.x
- 970 36. Chong, B. W. X. & Stinear, C. M. Modulation of motor cortex inhibition  
971 during motor imagery. *Journal of Neurophysiology* **117**, 1776–1784  
972 (2017).
- 973 37. Cash, R. F. H., Murakami, T., Chen, R., Thickbroom, G. W. & Ziemann,  
974 U. Augmenting Plasticity Induction in Human Motor Cortex by  
975 Disinhibition Stimulation. *Cereb. Cortex* **26**, 58–69 (2016).
- 976 38. Caux Dedeystère, A. *et al.* Task-dependent changes in late inhibitory and  
977 disinhibitory actions within the primary motor cortex in humans.  
978 *European Journal of Neuroscience* **39**, 1485–1490 (2014).
- 979 39. Ni, Z., Gunraj, C. & Chen, R. Short interval intracortical inhibition and  
980 facilitation during the silent period in human. *The Journal of Physiology*  
981 **583**, 971–982 (2007).
- 982 40. Leung, L. S. & Shen, B. GABAB receptor blockade enhances theta and  
983 gamma rhythms in the hippocampus of behaving rats. *Hippocampus* **17**,  
984 281–291 (2007).
- 985 41. Johnson, N. W. *et al.* Phase-amplitude coupled persistent theta and  
986 gamma oscillations in rat primary motor cortex in vitro.  
987 *Neuropharmacology* **119**, 141–156 (2017).
- 988 42. Buzsaki, G. *Rhythms of the Brain*. (2006) ISBN-13-978-0-19-530106-9  
989 (Oxford University Press, USA).
- 990 43. Yuval-Greenberg, S., Tomer, O., Keren, A. S., Nelken, I. & Deouell, L.  
991 Y. Transient induced gamma-band response in EEG as a manifestation of  
992 miniature saccades. *Neuron* **58**, 429–441 (2008).
- 993 44. Whitham, E. M. *et al.* Scalp electrical recording during paralysis:  
994 Quantitative evidence that EEG frequencies above 20 Hz are  
995 contaminated by EMG. *Clinical Neurophysiology* **118**, 1877–1888  
996 (2007).
- 997 45. Miller, K. J. *et al.* Cortical activity during motor execution, motor  
998 imagery, and imagery-based online feedback. *Proceedings of the*  
999 *National Academy of Sciences* **107**, 4430–4435 (2010).
- 1000 46. Zrenner, C., Desideri, D., Belardinelli, P. & Ziemann, U. Real-time EEG-  
1001 defined excitability states determine efficacy of TMS-induced plasticity  
1002 in human motor cortex. *Brain Stimul* **11**, 374–389 (2018).
- 1003 47. Mäki, H. & Ilmoniemi, R. J. EEG oscillations and magnetically evoked  
1004 motor potentials reflect motor system excitability in overlapping neuronal  
1005 populations. *Clinical Neurophysiology* **121**, 492–501 (2010).
- 1006 48. Pezzetta, R., Nicolardi, V., Tidoni, E. & Aglioti, S. M. Error, rather than  
1007 its probability, elicits specific electrocortical signatures: a combined

- 1008 EEG-immersive virtual reality study of action observation. *Journal of*  
1009 *Neurophysiology* jn.00130.2018 (2018). doi:10.1152/jn.00130.2018
- 1010 49. Ruddy, K. L., Leemans, A. & Carson, R. G. Transcallosal connectivity of  
1011 the human cortical motor network. *Brain Struct Funct* 222, 1243-1252  
1012 (2017). doi:DOI: 10.1007/s00429-016-1274-1
- 1013 50. Ruddy, K. L., Leemans, A., Woolley, D. G., Wenderoth, N. & Carson, R.  
1014 G. Structural and Functional Cortical Connectivity Mediating Cross  
1015 Education of Motor Function. *Journal of Neuroscience* 37, 2555–2564  
1016 (2017).
- 1017 51. Ruddy, K. L. Directionality of interhemispheric communication. *Brain*  
1018 *Structure and Function*. DOI 10.1107/s00429-017-1557-1 (2017).
- 1019 52. Baker, S. N., Olivier, E. & Lemon, R. N. Coherent oscillations in monkey  
1020 motor cortex and hand muscle EMG show task-dependent modulation.  
1021 *Journal of Physiology* 501(1), 225-241 (1997).
- 1022 53. Murthy, V. N. & Fetz, E. E. Oscillatory activity in sensorimotor cortex of  
1023 awake monkeys: synchronization of local field potentials and relation to  
1024 behavior. *Journal of Neurophysiology* 76, 3949–3967 (1996).
- 1025 54. Ramos-Murguialday, A. & Birbaumer, N. Brain oscillatory signatures of  
1026 motor tasks. *Journal of Neurophysiology* 113, 3663–3682 (2015).
- 1027 55. Pfurtscheller, G. & Neuper, C. Motor imagery activates primary  
1028 sensorimotor area in humans. *Neurosci Lett* 239, 65–68 (1997).
- 1029 56. Pfurtscheller, G. & Berghold, A. Patterns of cortical activation during  
1030 planning of voluntary movement. *Electroencephalogr Clin Neurophysiol*  
1031 72, 250–258 (1989).
- 1032 57. Alegre, M. *et al.* Alpha and beta oscillatory activity during a sequence of  
1033 two movements. *Clinical Neurophysiology* 115, 124–130 (2004).
- 1034 58. Brinkman, L., Stolk, A., Dijkerman, H. C., de Lange, F. P. & Toni, I.  
1035 Distinct Roles for Alpha- and Beta-Band Oscillations during Mental  
1036 Simulation of Goal-Directed Actions. *Journal of Neuroscience* 34,  
1037 14783–14792 (2014).
- 1038 59. Hammond, G. & Vallence, A.-M. Modulation of long-interval  
1039 intracortical inhibition and the silent period by voluntary contraction.  
1040 *Brain Res* 1158, 63–70 (2007).
- 1041 60. Opie, G. M., Ridding, M. C. & Semmler, J. G. Task-related changes in  
1042 intracortical inhibition assessed with paired- and triple-pulse transcranial  
1043 magnetic stimulation. *Journal of Neurophysiology* 113, 1470–1479  
1044 (2015).
- 1045 61. Murase, N., Duque, J., Mazzocchio, R. & Cohen, L. G. Influence of  
1046 interhemispheric interactions on motor function in chronic stroke. *Ann.*  
1047 *Neurol.* 55, 400–409 (2004).
- 1048 62. Oldfield, R. C. The assessment and analysis of handedness: The  
1049 Edinburgh Inventory. *Neuropsychologia* 9, 97–113 (1971).
- 1050 63. Carson, R. G. *et al.* Characterizing changes in the excitability of  
1051 corticospinal projections to proximal muscles of the upper limb. *Brain*  
1052 *Stimul* 6, 760–768 (2013).
- 1053 64. Ruddy, K. L. *et al.* Improving the quality of combined EEG-TMS neural  
1054 recordings: Introducing the coil spacer. *Journal of Neuroscience Methods*  
1055 294, 34–39 (2018).
- 1056 65. Gueorguieva, R. & Krystal, J. H. Move over ANOVA: progress in  
1057 analyzing repeated-measures data and its reflection in papers published in

- 1058 the Archives of General Psychiatry. *Arch. Gen. Psychiatry* **61**, 310–317  
1059 (2004).  
1060 66. Guyon, I., Weston, J., Barnhill, S. & Vapnik, V. Gene Selection for  
1061 Cancer Classification using Support Vector Machines. *Machine Learning*  
1062 **46**, 389–422 (2002).  
1063 67. Peurala, S. H., Müller-Dahlhaus, J. F. M., Arai, N. & Ziemann, U.  
1064 Interference of short-interval intracortical inhibition (SICI) and short-  
1065 interval intracortical facilitation (SICF). *Clinical Neurophysiology* **119**,  
1066 2291–2297 (2008).  
1067 68. McDonnell, M. N., Orekhov, Y. & Ziemann, U. The role of GABA<sub>B</sub>  
1068 receptors in intracortical inhibition in the human motor cortex. *Exp Brain*  
1069 *Res* **173**, 86–93  
1070  
1071

## 1072 **Acknowledgements**

1073 This work was supported by grant number 320030\_175616 from the Swiss National  
1074 Science Foundation. KLR is supported by a research fellowship from the Irish  
1075 Research Council, GOIPD/2017/798. We thank Dr. Robin Cash for helpful comments  
1076 in preparing this manuscript  
1077

## 1078 **Author contributions**

1079 KR and NW conceived the experiment. KR and NE performed the measurements.  
1080 KR, EM and BC analyzed the data. KR, SRS, DM, JB and NW edited the manuscript.  
1081 All authors contributed to the scientific discussion and manuscript revisions.

1082

1083 **Competing interests:** The authors declare no competing financial interests

1084

1085

1086

## 1087 **FIGURE LEGENDS**

1088

1089 **Figure 1. Outline of experimental setup.** Each trial of neurofeedback training  
1090 commenced with a display of four circles (A), each representing the background EMG  
1091 in one of the recorded hand muscles (right FDI, ADM and OP, and left FDI). The circles  
1092 were red if the root mean squared (rms) EMG at rest was greater than 7 microvolts. It  
1093 was essential that all four circles were green for at least 500ms before the trial could  
1094 proceed. When this condition was met a fixation cross appeared for a random period  
1095 (in order to prevent anticipation of the TMS pulse). During the fixation cross, it was

1096 still essential to keep the background EMG below 7 microvolts in order for a TMS  
1097 pulse to be delivered. (B) The peak-peak amplitude of the motor evoked potential  
1098 (MEP) evoked by the TMS was calculated in real-time and displayed immediately to  
1099 the participant on screen in the form of a rectangular bar.  
1100 (C) Different feedback for UP training and DOWN training. In the UP training If the  
1101 MEP was greater than the baseline mean, the rectangle was green, with a green tick, a  
1102 dollar sign to indicate a small financial reward, a display of the current score, and a  
1103 positive encouraging sound bite was heard. If the MEP did not meet the criterion  
1104 amplitude, the bar was red, there was no dollar sign, and a negative sound bite was  
1105 heard. (D) A custom 3D printed ‘coil spacer’ device was used to prevent direct contact  
1106 of the TMS coil on the EEG electrodes and allow the pre-TMS EEG period to be  
1107 recorded artefact free.

1108

1109 **Figure 2. MEP amplitudes during neurofeedback.** Panel A depicts MEP amplitude  
1110 in millivolts during the two types of MEP neurofeedback. UP training is shown in  
1111 orange and DOWN training in blue, across all 10 training blocks. Filled triangles  
1112 labelled ‘BS’ indicate the baseline measurement block that occurred at the beginning  
1113 of that particular session, prior to any neurofeedback. Dotted vertical lines indicate the  
1114 separation of the blocks into different ‘sessions’, which occurred on separate days.  
1115 Panel B shows the same data for the control group who received no veridical  
1116 neurofeedback. Panel C shows the UP-DOWN difference (in the normalised % change  
1117 from baseline data) for each block in the experimental group and the control group.  
1118 Higher values represent greater deviations between the UP and DOWN data points and  
1119 therefore more modulation of MEP amplitude. Thus, these values are significantly  
1120 higher in the experimental group than in the control group. # symbols indicate blocks  
1121 in which the Cohen’s *d* effect size for the difference between the experimental and  
1122 control group was large-very large ( $>0.8$ ). All data are shown as mean  $\pm$ SEM.

1123

1124 **Figure 3. Retention, aftereffects and feedback-free measurements.** Filled bars  
1125 represent blocks of neurofeedback, and unfilled bars represent MEPs collected at rest.  
1126 Panel A shows MEP amplitudes with their preceding resting baseline values subtracted.  
1127 Values above 0 represent increases relative to baseline, and below 0 represent  
1128 decreases. State-dependent neurofeedback training feedback effects were still evident  
1129 in a retention block carried out approximately 6 months following the initial



1130 experiment. No aftereffects were observed on resting MEP amplitude 5 and 10 minutes  
1131 later. In a separate block participants were capable of upregulating and downregulating  
1132 MEP amplitudes with feedback removed (FB free). MEPs measured from the opposite  
1133 hemisphere during neurofeedback exhibited a similar pattern of modulation.

1134

1135 **Figure 4. Investigation into mechanisms of MEP neurofeedback.** The data show  
1136 paired pulse TMS measurements taken during neurofeedback blocks to probe distinct  
1137 neurophysiological processes. In all subsequent panels, unfilled bars represent baseline  
1138 MEP amplitudes collected at rest prior to the block. Panel A Shows that MEP  
1139 amplitudes from the single pulses (from which neurofeedback was provided) exhibited  
1140 the same state-dependent modulation as observed previously. In Panel B MEP  
1141 amplitudes are expressed as a percentage of the single pulse MEPs. While expected  
1142 levels of inhibition were observed for both SICI and LICI paired pulses, there was no  
1143 state-dependent modulation. LCD was, however, significantly increased in the UP  
1144 condition relative to baseline, and relative to the DOWN condition.

1145

1146

1147 **Figure 5. Neural oscillations associated with the trained brain states.** Panels b-f  
1148 show topographical representations of the relative power (in % of whole spectrum) in  
1149 the UP condition minus the DOWN condition, for 5 distinct frequency bands (Averaged  
1150 group data, n=14, 3 other frequency bands shown in Supplementary Fig 3). Red colours  
1151 indicate regions that demonstrated greater synchronisation in the UP condition. Blue  
1152 colours indicate greater synchronization in the DOWN condition. The location of the  
1153 electrode nearest to the TMS hotspot varied between participants but was always within  
1154 the region indicated in a). Colours are scaled from blue-red by minimum-maximum  
1155 (range shown to right of each plot). Panel g shows the same data (UP-DOWN) extracted  
1156 for each participant's hotspot electrode. Values greater than 0 indicate larger amplitude  
1157 oscillations in the UP condition, and lower than 0 indicate larger oscillations in the  
1158 DOWN condition. Stars indicate significant deviations from 0 (Wilcoxon Signed Rank  
1159 tests). Panel h shows group level data for regression analyses performed on MEP  
1160 amplitudes with relative power in each frequency band. This included all 120 trials (60  
1161 UP, 60 DOWN) collected during the combined TMS-EEG recording session. The Y  
1162 axis depicts the slope of the regression model. Stars indicate significant deviations from

1163 0 (0 would indicate no slope, Wilcoxon Signed Rank test). Individual regression plots  
1164 are shown for one representative participant in Supplementary Fig. 4.  
1165

**A**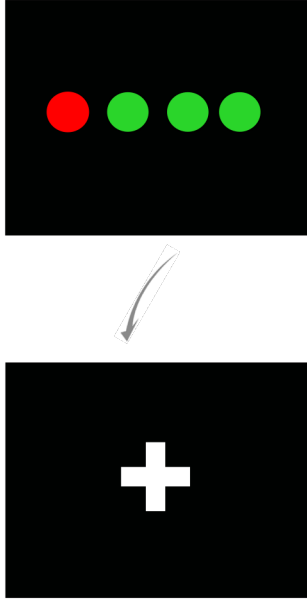**B**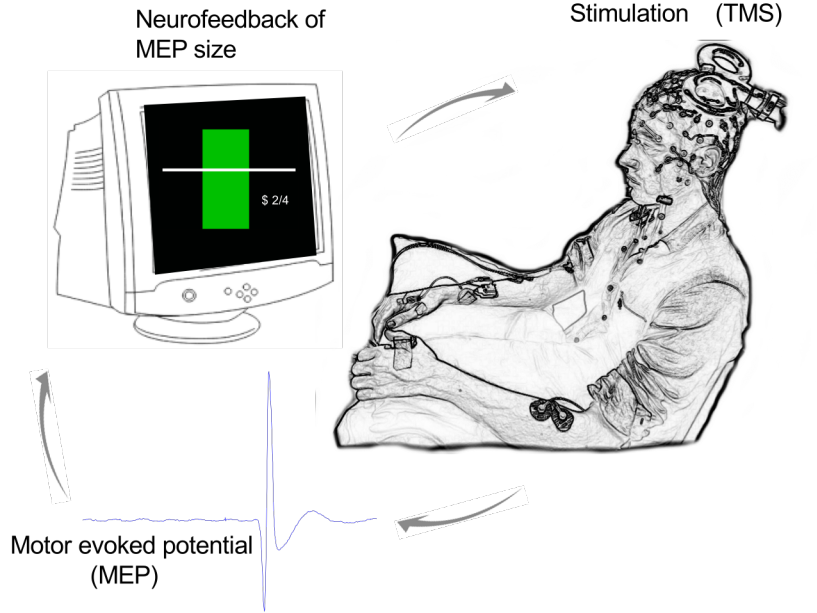**C**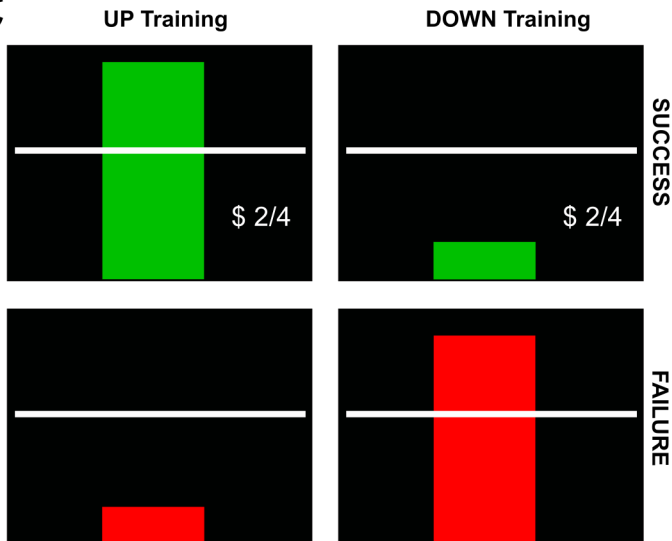**D**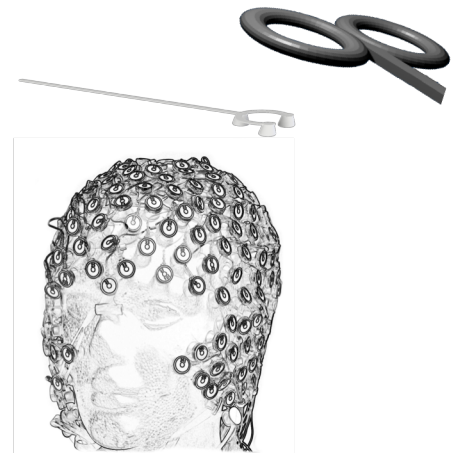

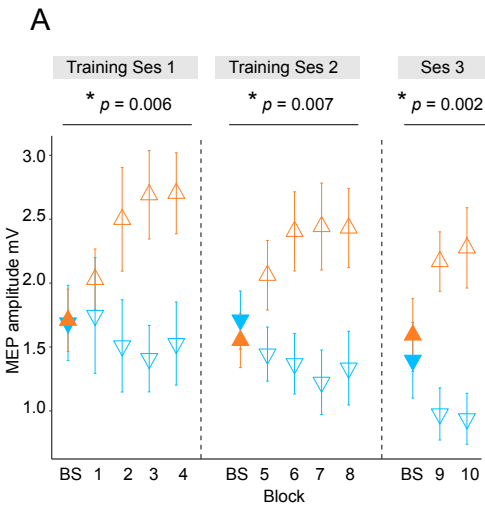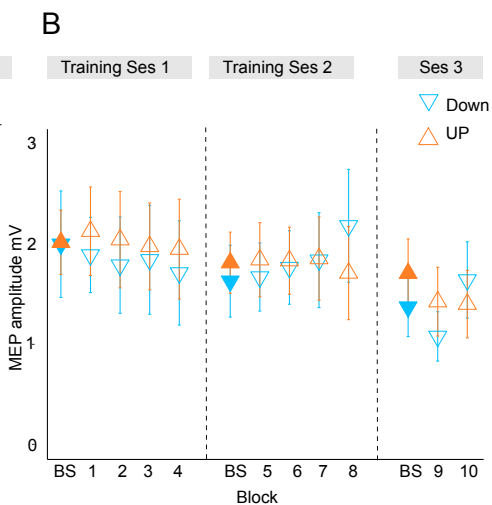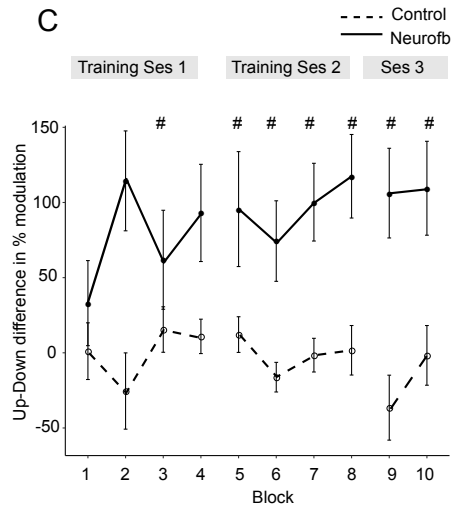

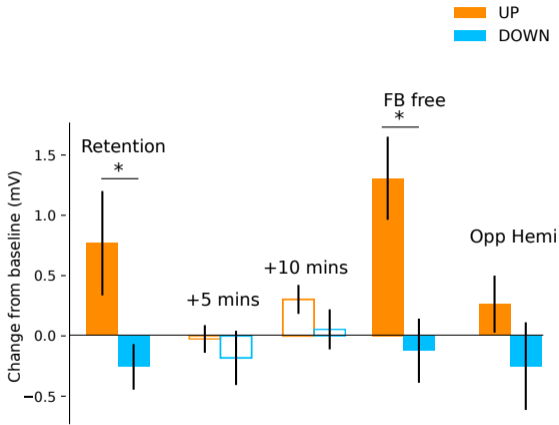



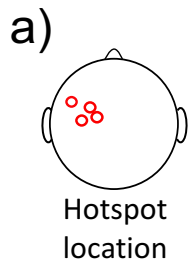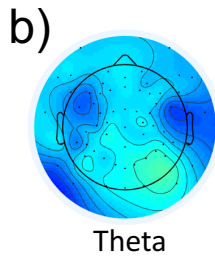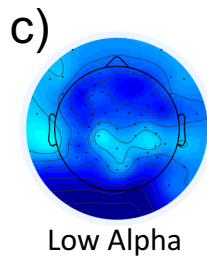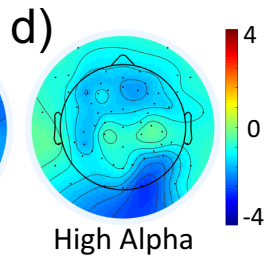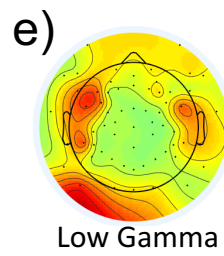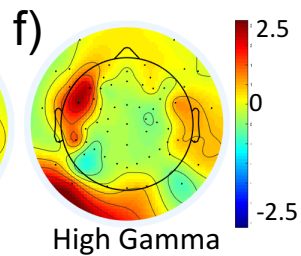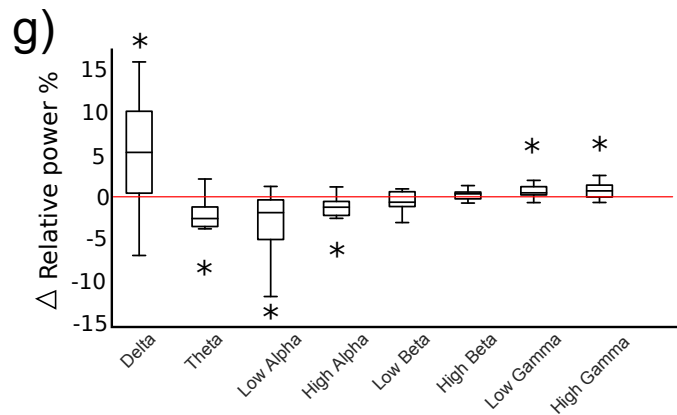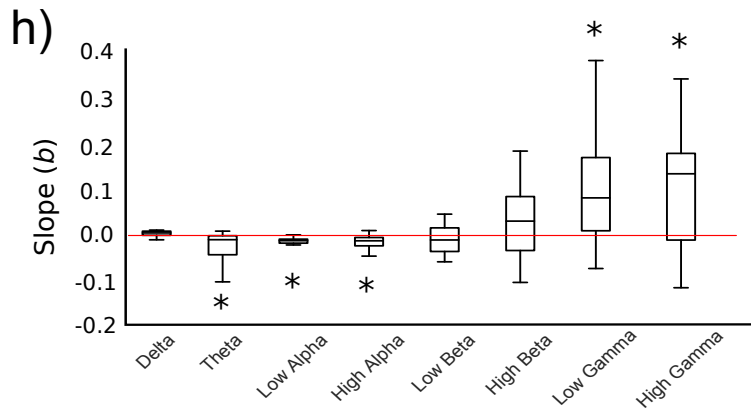

Source: http://biorxiv.org/content/10.1101/370130v2.full.pdf
